# Supplementary material for: CRISPR Screening of CAR T Cells and Cancer Stem Cells Reveals Critical Dependencies for Cell-Based Therapies
Source: Oxford University Press journal article supplement (doi:10.1158/2159-8290.cd-20-1243), 2020-12-16
Supplement: 21598290cd201243-sup-250070_2_supp_6751857_qkf4tc.xlsx [file 21598290cd201243-sup-250070_2_supp_6751857_qkf4tc.xlsx]

## Sheet: Copy of RankedHitsFor3f
Gene	Enrichment		Gene	Enrichment		Gene	Enrichment		Gene	Enrichment
SEL1L3	3.15565		TIMM22	1.8449		DNAH11	1.55245		AADAT	1.27385
RXRG	2.77905		PIGR	1.83365		CARD16	1.54205		DNAH5	1.2674
EIF5A	2.773		ATP6V1E2	1.8199		EGFL7	1.53965		TSSK3	1.26545
C14orf166	2.75935		GNRHR	1.81665		ST7L	1.5348		SMR3B	1.25785
MLC1	2.71775		GPR83	1.8162		MLLT4	1.52635		C12orf42	1.257
PSORS1C2	2.65995		MMACHC	1.8149		TMEM95	1.52295		MCUR1	1.25645
COG7	2.6155		JADE2	1.81365		CCL8	1.49605		RGPD3	1.246
ZBTB10	2.467		GPR20	1.8119		HMMR	1.4945		GPR39	1.2433
ERCC6L	2.46515		MAGEB1	1.80755		GMEB2	1.4789		SGCD	1.2405
SYK	2.46395		TCEANC2	1.8067		ABCA2	1.472		ZNF592	1.2371
YPEL3	2.45765		PAQR9	1.8047		C4B	1.47		DHRS9	1.23215
HTR4	2.42875		ADPRH	1.7967		ST3GAL4	1.46945		HUNK	1.23115
MME	2.41685		RNF222	1.79155		LRFN2	1.4687		RALBP1	1.22875
CDNF	2.36145		PHF6	1.7733		ZNF354C	1.4542		ZBTB48	1.2277
PLXNA4	2.34925		NCDN	1.77005		PCDH11X	1.4502		ZNF70	1.22385
CHML	2.2995		RNF138	1.76685		GLIPR1L2	1.44445		CXCR3	1.22145
TAC4	2.29825		NDEL1	1.7655		CEP120	1.43855		FAM57A	1.2199
TMEM39B	2.28175		CFHR5	1.76405		CCDC77	1.43785		FARP1	1.2197
TBX10	2.27345		ATP2A1	1.7624		ACSL1	1.4311		CLSTN3	1.2123
WARS	2.2684		DNASE1L1	1.7612		ANTXR1	1.4308		DDB2	1.21165
APOL4	2.23055		C14orf132	1.75275		ICOS	1.42615		IL1RN	1.21105
DHX16	2.2013		SLC43A3	1.74675		CTNNAL1	1.4236		LRRC49	1.21055
CADM3	2.1881		FBXO27	1.7368		ERLIN2	1.42305		FZD9	1.2082
TLE4	2.18255		RAB23	1.71885		ARSJ	1.4221		CSH2	1.208
SLC18B1	2.1752		XIRP2	1.7147		SNRPD3	1.42095		OR13F1	1.2039
RNASEL	2.16995		NLRP1	1.70695		NMNAT1	1.41815		DPYSL3	1.18675
TMEM80	2.10835		POLR3G	1.6797		SPATA4	1.4178		C20orf141	1.18245
SV2B	2.1055		FAM219A	1.67465		C7orf60	1.4033		ARPC3	1.1788
KLHL33	2.09825		SNX29	1.6654		ELK3	1.40115		PTPRG	1.17805
TMEM184B	2.09715		NTPCR	1.65555		CYB5A	1.3928		ZNF99	1.1734
DOT1L	2.05795		RBBP8NL	1.6539		BIRC6	1.38515		TGFBR3L	1.1726
SLC35D2	2.04645		CAMTA1	1.6529		PRKAA1	1.38025		RANBP6	1.1702
EID3	2.0363		NR0B1	1.65125		ZNF235	1.37775		OXGR1	1.1598
SPG7	2.0277		ASAP3	1.64915		FAM25C	1.3498		PRORY	1.15255
CBWD2	2.0193		TTI2	1.64665		MRPL11	1.3403		BPI	1.147
ANKUB1	2.01795		ZBTB41	1.6302		ZSWIM8	1.339		C4orf48	1.14665
SLC35D3	2.01715		LRP1	1.61915		SLC44A5	1.33545		DSPP	1.14605
CENPBD1	1.9954		PYY	1.6188		LOC730183	1.32535		TBPL2	1.14425
RAB3A	1.9727		ANKRD28	1.616		EIF2S2	1.3214		PADI6	1.1437
EAF2	1.97225		ADAMTSL1	1.59735		ERCC4	1.3193		AKAP1	1.13805
IKZF2	1.9635		ADAL	1.5968		NR2E1	1.31535		DEFB126	1.13135
LSM5	1.9485		C9orf172	1.59035		PSMA2	1.31475		ZNF141	1.1284
SORBS2	1.9438		ZSCAN1	1.5901		CAMTA2	1.3113		NUBP2	1.12765
SMAD2	1.93745		MORN3	1.5892		GTF2H3	1.30825		AGAP3	1.1209
VWA9	1.93245		PCDHB2	1.58755		RPH3A	1.30715		DOPEY2	1.11875
ZRANB2	1.93115		LTB	1.58465		ZNF766	1.2979		OR10V1	1.11265
MRPL42	1.93085		TSPAN5	1.5797		INTS12	1.29365		RPL19	1.10805
EPPK1	1.92875		FAM199X	1.5794		KPNA2	1.2872		MYO1F	1.10185
SMG1	1.91575		NT5C1A	1.5745		AMY2A	1.28325		MYH14	1.0942
CAPRIN1	1.91475		DNAJC16	1.57085		CPNE5	1.28315		SPHKAP	1.08525
KRBA2	1.89985		TCP11L1	1.5663		MAFG	1.2828		TBCE	1.0817
TNFAIP8L1	1.88815		CLEC6A	1.56605		FILIP1	1.27905		OR10T2	1.0479
S100A5	1.8843		KIAA2026	1.5625		ZNF878	1.27765		REP15	1.04175
OR14C36	1.86325		GCG	1.5595		EPGN	1.27595		TEC	1.02885
TBC1D22B	1.8585		C14orf93	1.55485		FGF13	1.27465		ZIC2	1.0158
